# Supplementary material
Source: bioRxiv or medRxiv preprint supplement (https://www.biorxiv.org/highwire/filestream/77203/field_highwire_adjunct_files/0/251462-1.pdf)
Supplement: Supplementary file [file 251462-1.pdf]

## Supplementary Data

**Table S1.** Summary and accession information for all NCBI reference genomes used in the simulated Illumina sequencing for this study.

See attached file: simulatedDatasets.xlsx

**Table S2.** Performance of automated binning programs compared to a previous semi-manual approach (Miller, Vanev, *et al.*, 2016) in recovery of the “*Candidatus Endobugula sertula*”.

| Method      | Length (Mbp) | no. contigs | % "Ca. E. sertula" recovered (contigs, length) | completeness | purity |
|-------------|--------------|-------------|------------------------------------------------|--------------|--------|
| Autometa    | 3.73         | 186         | 96.7% (101, 3,218,088 bp)                      | 96.2         | 96.5   |
| MaxBin      | 3.71         | 175         | 91.8% (88, 3,055,541 bp)                       | 96.2         | 96.0   |
| MetaBAT     | 2.9          | 90          | 86.6% (86, 2,881,097 bp)                       | 93.2         | 98.0   |
| MyCC        | 2.84         | 168         | 68.7% (73, 2,286,775 bp)                       | 71.6         | 98.2   |
| semi-manual | 3.32         | 117         | 100% (117, 3,326,817 bp)                       | 96.2         | 97.5   |

**Table S3.** Percentage of binned sequence by length based on kingdom level classification as inferred from Autometa’s Lowest Common Ancestor (LCA) workflow.

| Method   | Bacteria | Eukaryota | Viruses | Archaea | unclassified |
|----------|----------|-----------|---------|---------|--------------|
| Autometa | 100      | 0.0       | 0.0     | 0.0     | 0.0          |
| MyCC     | 24.7     | 13.5      | 0.2     | 0.1     | 61.5         |
| MaxBin   | 28.5     | 11.9      | 0.2     | 0.1     | 59.4         |
| MetaBAT  | 24.6     | 13.2      | 0.2     | 0.1     | 61.9         |

**Table S4.** Results of MyCC binning on AB1\_ovicells contigs that were unfiltered by Autometa's LCA workflow.

| MyCC cluster | Size (Mbp) | N <sub>50</sub> | No. contigs | CheckM completeness (%) | CheckM purity (%) | Coverage | GC (%) | CheckM lineage         |
|--------------|------------|-----------------|-------------|-------------------------|-------------------|----------|--------|------------------------|
| Cluster.8    | 136.29     | 9923            | 16825       | 41.5                    | 87.5              | 30.5     | 33.5   | k__Archaea             |
| Cluster.2    | 31.68      | 14997           | 2811        | 37.6                    | 77.3              | 2.1      | 34.5   | k__Archaea             |
| Cluster.16   | 17.12      | 11618           | 1879        | 74.4                    | 65.1              | 5.0      | 41.3   | k__Archaea             |
| Cluster.5    | 11.61      | 9846            | 1474        | 89.6                    | 82.9              | 1.6      | 41.2   | k__Bacteria            |
| Cluster.1    | 7.76       | 33113           | 430         | 93.8                    | 89.8              | 2.3      | 50.4   | c__Gammaproteobacteria |
| Cluster.19   | 4.17       | 46272           | 231         | 92.6                    | 92.7              | 2.0      | 60.4   | f__Rhodobacteraceae    |
| Cluster.14   | 3.45       | 20489           | 283         | 87.9                    | 54.9              | 5.0      | 46.4   | k__Bacteria            |
| Cluster.11   | 3.42       | 6074            | 561         | 40.0                    | 88.3              | 1.6      | 53.9   | f__Rhodobacteraceae    |
| Cluster.12   | 3.13       | 10960           | 354         | 24.1                    | 94.8              | 4.2      | 43.8   | k__Bacteria            |
| Cluster.20   | 3.00       | 4960            | 609         | 34.0                    | 98.8              | 1.3      | 50.8   | k__Bacteria            |
| Cluster.4    | 2.83       | 43116           | 168         | 71.6                    | 98.2              | 4.4      | 40.2   | c__Gammaproteobacteria |
| Cluster.18   | 2.65       | 6118            | 406         | 56.5                    | 89.3              | 1.7      | 43.6   | c__Gammaproteobacteria |
| Cluster.13   | 1.99       | 27349           | 126         | 98.7                    | 100.0             | 26.6     | 34.3   | k__Bacteria            |
| Cluster.15   | 1.78       | 6310            | 303         | 67.9                    | 97.7              | 1.5      | 40.1   | c__Gammaproteobacteria |
| Cluster.22   | 1.31       | 4099            | 299         | 26.0                    | 100.0             | 6.2      | 33.1   | s__algalicola          |
| Cluster.10   | 1.06       | 4363            | 233         | 40.3                    | 100.0             | 1.3      | 48.9   | c__Gammaproteobacteria |
| Cluster.9    | 0.83       | 4168            | 195         | 16.7                    | 100.0             | 1.2      | 49.3   | root                   |
| Cluster.7    | 0.81       | 4491            | 172         | 17.8                    | 99.6              | 1.4      | 49.3   | c__Gammaproteobacteria |
| Cluster.6    | 0.72       | 4047            | 172         | 17.2                    | 100.0             | 1.2      | 48.2   | k__Bacteria            |
| Cluster.3    | 0.70       | 593222          | 16          | 15.7                    | 100.0             | 16.4     | 22.8   | k__Bacteria            |
| Cluster.21   | 0.65       | 17313           | 58          | 61.5                    | 99.8              | 6.7      | 23.7   | k__Bacteria            |
| Cluster.17   | 0.60       | 16076           | 65          | 10.3                    | 94.0              | 7.8      | 33.3   | p__Cyanobacteria       |

**Table S5.** Length of sequence (in bp) based on kingdom level classification in MyCC bins that were unfiltered by Autometa's LCA workflow.

| MyCC_cluster | Bacteria   | Eukaryota  | Viruses | Archaea | unclassified | total length |
|--------------|------------|------------|---------|---------|--------------|--------------|
| Cluster.8    | 3,129,421  | 23,629,421 | 38,514  | 299,748 | 109,189,222  | 136,286,326  |
| Cluster.2    | 1,763,368  | 4,663,853  | 29,801  | 34,257  | 25,190,411   | 31,681,690   |
| Cluster.16   | 2,480,635  | 3,342,491  | 61,185  | 40,085  | 11,198,545   | 17,122,941   |
| Cluster.5    | 11,555,610 | 0          | 0       | 0       | 52,497       | 11,608,107   |
| Cluster.1    | 7,702,631  | 5,550      | 0       | 0       | 51,469       | 7,759,650    |
| Cluster.19   | 4,171,828  | 0          | 0       | 0       | 0            | 4,171,828    |
| Cluster.14   | 3,413,645  | 0          | 0       | 11,925  | 28,344       | 3,453,914    |
| Cluster.11   | 3,373,766  | 9,037      | 0       | 0       | 34,513       | 3,417,316    |
| Cluster.12   | 3,067,560  | 3,490      | 0       | 28,361  | 33,458       | 3,132,869    |
| Cluster.20   | 2,935,365  | 5,355      | 0       | 0       | 54,441       | 2,995,161    |
| Cluster.4    | 2,786,399  | 8,449      | 0       | 3,288   | 34,683       | 2,832,819    |
| Cluster.18   | 2,648,425  | 0          | 0       | 0       | 3,763        | 2,652,188    |
| Cluster.13   | 1,777,789  | 140,579    | 0       | 0       | 72,184       | 1,990,552    |
| Cluster.15   | 1,770,202  | 0          | 0       | 0       | 8,513        | 1,778,715    |
| Cluster.22   | 1,254,005  | 15,479     | 0       | 27,945  | 11,970       | 1,309,399    |
| Cluster.10   | 1,055,973  | 0          | 0       | 0       | 0            | 1,055,973    |
| Cluster.9    | 829,401    | 0          | 0       | 0       | 0            | 829,401      |
| Cluster.7    | 785,921    | 0          | 0       | 11,309  | 16,013       | 813,243      |
| Cluster.6    | 718,005    | 0          | 0       | 0       | 0            | 718,005      |
| Cluster.3    | 608,007    | 19,179     | 0       | 0       | 73,961       | 701,147      |
| Cluster.21   | 538,243    | 35,539     | 0       | 0       | 78,722       | 652,504      |
| Cluster.17   | 290,066    | 218,709    | 0       | 4,042   | 88,344       | 601,161      |

**Table S6.** Fraction of reference genome in MIX-51 successfully assembled by metaSPAdes (v3.9.0) (Nurk *et al.*, 2017) and F1 for each binning program as determined by alignments to known reference genomes using metaQUAST (Mikheenko *et al.*, 2016).

| Genome                                       | Fraction Assembled (%) | Autometa F1 | MyCC F1 | MaxBin F1 | MetaBAT F1 |
|----------------------------------------------|------------------------|-------------|---------|-----------|------------|
| <i>Alistipes indistinctus</i>                | 99.5                   | 0.996       | 0.989   | 0.966     | 0.996      |
| <i>Bacteroides cellulosilyticus</i>          | 93.1                   | 0.859       | 0.276   | 0.139     | 0.345      |
| <i>Bacteroides dorei</i>                     | 83.3                   | 0.000       | 0.181   | 0.415     | 0.158      |
| <i>Bacteroides fingoldii</i>                 | 91.9                   | 0.000       | 0.180   | 0.098     | 0.192      |
| <i>Bacteroides intestinalis</i>              | 94.7                   | 0.904       | 0.244   | 0.244     | 0.288      |
| <i>Bacteroides ovatus</i>                    | 95.6                   | 0.639       | 0.260   | 0.317     | 0.283      |
| <i>Bacteroides plebeius</i>                  | 95.4                   | 0.928       | 0.930   | 0.227     | 0.175      |
| <i>Bacteroides stercoris</i>                 | 95.4                   | 0.915       | 0.449   | 0.388     | 0.505      |
| <i>Bacteroides thetaiotaomicron</i> 3731     | 59.9                   | 0.000       | 0.113   | 0.261     | 0.204      |
| <i>Bacteroides thetaiotaomicron</i> 7330     | 68.2                   | 0.000       | 0.095   | 0.366     | 0.264      |
| <i>Bacteroides thetaiotaomicron</i> VPI-5482 | 78.1                   | 0.022       | 0.148   | 0.547     | 0.390      |
| <i>Bacteroides uniformis</i>                 | 96.2                   | 0.981       | 0.686   | 0.588     | 0.877      |
| <i>Bacteroides vulgatus</i>                  | 66.3                   | 0.000       | 0.130   | 0.320     | 0.110      |
| <i>Bifidobacterium adolescentis</i>          | 95.4                   | 0.790       | 0.399   | 0.443     | 0.523      |
| <i>Bifidobacterium angulatum</i>             | 97.3                   | 0.736       | 0.347   | 0.672     | 0.349      |
| <i>Bifidobacterium bifidum</i>               | 98.9                   | 0.966       | 0.961   | 0.961     | 0.966      |
| <i>Bifidobacterium dentium</i>               | 97.9                   | 0.566       | 0.450   | 0.480     | 0.578      |
| <i>Bifidobacterium pseudocatenulatum</i>     | 89.6                   | 0.525       | 0.319   | 0.806     | 0.723      |
| <i>Blautia hansenii</i>                      | 96.5                   | 0.947       | 0.516   | 0.904     | 0.957      |
| <i>Blautia luti</i> DSM 14534                | 68.0                   | 0.724       | 0.314   | 0.376     | 0.712      |
| <i>Citrobacter youngae</i>                   | 99.1                   | 0.897       | 0.449   | 0.575     | 0.540      |
| <i>Clostridium asparagiforme</i>             | 96.7                   | 0.974       | 0.977   | 0.975     | 0.972      |
| <i>Clostridium bolteae</i>                   | 97.3                   | 0.894       | 0.493   | 0.968     | 0.963      |
| <i>Clostridium hathewayi</i>                 | 88.3                   | 0.925       | 0.507   | 0.454     | 0.765      |
| <i>Clostridium hylemonae</i>                 | 97.5                   | 0.947       | 0.947   | 0.947     | 0.947      |
| <i>Clostridium</i> M62 1                     | 93.8                   | 0.941       | 0.931   | 0.935     | 0.917      |
| <i>Clostridium nexile</i>                    | 89.5                   | 0.829       | 0.800   | 0.408     | 0.564      |
| <i>Clostridium ramosum</i>                   | 99.2                   | 0.989       | 0.571   | 0.807     | 0.558      |
| <i>Clostridium sporogenes</i>                | 99.0                   | 1.000       | 0.990   | 0.995     | 1.000      |
| <i>Clostridium symbiosum</i>                 | 98.8                   | 0.929       | 0.412   | 0.670     | 0.367      |

|                                     |      |       |       |       |       |
|-------------------------------------|------|-------|-------|-------|-------|
| <i>Collinsella intestinalis</i>     | 98.9 | 0.999 | 0.601 | 0.999 | 0.930 |
| <i>Collinsella stercoris</i>        | 94.0 | 0.795 | 0.551 | 0.792 | 0.746 |
| <i>Coprococcus comes</i>            | 95.9 | 0.844 | 0.439 | 0.204 | 0.624 |
| <i>Dorea formicigenerans</i>        | 94.8 | 0.868 | 0.432 | 0.210 | 0.682 |
| <i>Edwardsiella tarda</i>           | 96.1 | 0.951 | 0.951 | 0.951 | 0.772 |
| <i>Enterobacter cancerogenus</i>    | 98.5 | 0.998 | 0.473 | 0.763 | 0.561 |
| <i>Escherichia fergusonii</i>       | 97.1 | 0.961 | 0.473 | 0.968 | 0.694 |
| <i>Eubacterium bifforme</i>         | 94.4 | 0.985 | 0.973 | 0.901 | 0.903 |
| <i>Eubacterium eligens</i>          | 98.8 | 0.988 | 0.983 | 0.981 | 0.986 |
| <i>Holdemanina filiformis</i>       | 95.9 | 0.989 | 0.982 | 0.948 | 0.982 |
| <i>Lactobacillus reuteri</i>        | 95.2 | 0.988 | 0.978 | 0.978 | 0.975 |
| <i>Lactobacillus ruminis</i>        | 82.6 | 0.988 | 0.988 | 0.988 | 0.899 |
| <i>Marvinbryantia formatexigens</i> | 98.6 | 0.983 | 0.965 | 0.943 | 0.961 |
| <i>Megamonas funiformis</i>         | 97.4 | 0.999 | 0.994 | 0.789 | 0.999 |
| <i>Parabacteroides johnsonii</i>    | 91.7 | 0.493 | 0.605 | 0.555 | 0.547 |
| <i>Parabacteroides merdae</i>       | 93.8 | 0.570 | 0.628 | 0.574 | 0.662 |
| <i>Proteus penneri</i>              | 99.5 | 0.993 | 0.990 | 0.988 | 0.717 |
| <i>Roseburia intestinalis</i>       | 93.4 | 0.957 | 0.904 | 0.908 | 0.940 |
| <i>Ruminococcus gnavus</i>          | 95.2 | 0.797 | 0.821 | 0.172 | 0.433 |
| <i>Streptococcus infantarius</i>    | 99.0 | 0.999 | 0.985 | 0.992 | 0.754 |
| <i>Subdoligranulum variabile</i>    | 97.0 | 0.626 | 0.691 | 0.957 | 0.593 |

**Table S7.** Recall and precision values for *Bacteroides thetaiotaomicron* strains in Mix-51.

|                                     |                  | Autometa | MyCC | MaxBin | MetaBAT |
|-------------------------------------|------------------|----------|------|--------|---------|
| <i>B. thetaiotaomicron</i> 7330     | <b>recall</b>    | 0        | 94   | 62     | 59      |
|                                     | <b>precision</b> | 0        | 5    | 26     | 17      |
| <i>B. thetaiotaomicron</i> VPI-5482 | <b>recall</b>    | 3        | 95   | 70     | 64      |
|                                     | <b>precision</b> | 2        | 8    | 45     | 28      |
| <i>B. thetaiotaomicron</i> 3731     | <b>recall</b>    | 0        | 93   | 37     | 38      |
|                                     | <b>precision</b> | 0        | 6    | 20     | 14      |

**Table S8.** Total number of bins recovered by tested binning programs, where “NA” denotes cases where programs failed to complete successfully.

| Method   | 78.125 Mbp | 156.25 Mbp | 312.5 Mbp | 625 Mbp | 1250 Mbp | 2500 Mbp | 5000 Mbp | 10000 Mbp |
|----------|------------|------------|-----------|---------|----------|----------|----------|-----------|
| Autometa | 23         | 46         | 90        | 171     | 384      | 613      | 940      | 161       |
| MyCC     | 23         | 42         | 81        | 139     | 275      | 315      | NA       | NA        |
| MaxBin   | 22         | 38         | 62        | 109     | 185      | 298      | 565      | 116       |
| MetaBAT  | 21         | 42         | 75        | 118     | 233      | 347      | NA       | NA        |

**Table S9.** Quantitative data for median F1 values, where “NA” denotes cases where programs failed to complete successfully.

| Method   | 78.125 Mbp | 156.25 Mbp | 312.5 Mbp | 625 Mbp | 1250 Mbp | 2500 Mbp | 5000 Mbp | 10000 Mbp |
|----------|------------|------------|-----------|---------|----------|----------|----------|-----------|
| Autometa | 1.00       | 0.98       | 0.99      | 0.98    | 0.98     | 0.95     | 0.90     | 0.01      |
| MyCC     | 0.99       | 0.97       | 0.93      | 0.88    | 0.74     | 0.46     | NA       | NA        |
| MaxBin   | 0.98       | 0.94       | 0.91      | 0.67    | 0.42     | 0.17     | 0.23     | 0.02      |
| MetaBAT  | 0.97       | 0.87       | 0.96      | 0.60    | 0.45     | 0.24     | NA       | NA        |

**Table S10.** Quantitative data for F1 recovery values, where “NA” denotes cases where programs failed to complete successfully.

| Method   | 78.125 Mbp | 156.25 Mbp | 312.5 Mbp | 625 Mbp | 1250 Mbp | 2500 Mbp | 5000 Mbp | 10000 Mbp |
|----------|------------|------------|-----------|---------|----------|----------|----------|-----------|
| Autometa | 0.98       | 0.91       | 0.91      | 0.89    | 0.87     | 0.77     | 0.60     | 0.08      |
| MyCC     | 0.98       | 0.89       | 0.92      | 0.78    | 0.70     | 0.48     | NA       | NA        |
| MaxBin   | 0.86       | 0.79       | 0.66      | 0.55    | 0.46     | 0.37     | 0.33     | 0.04      |
| MetaBAT  | 1.00       | 0.72       | 0.77      | 0.58    | 0.49     | 0.40     | NA       | NA        |

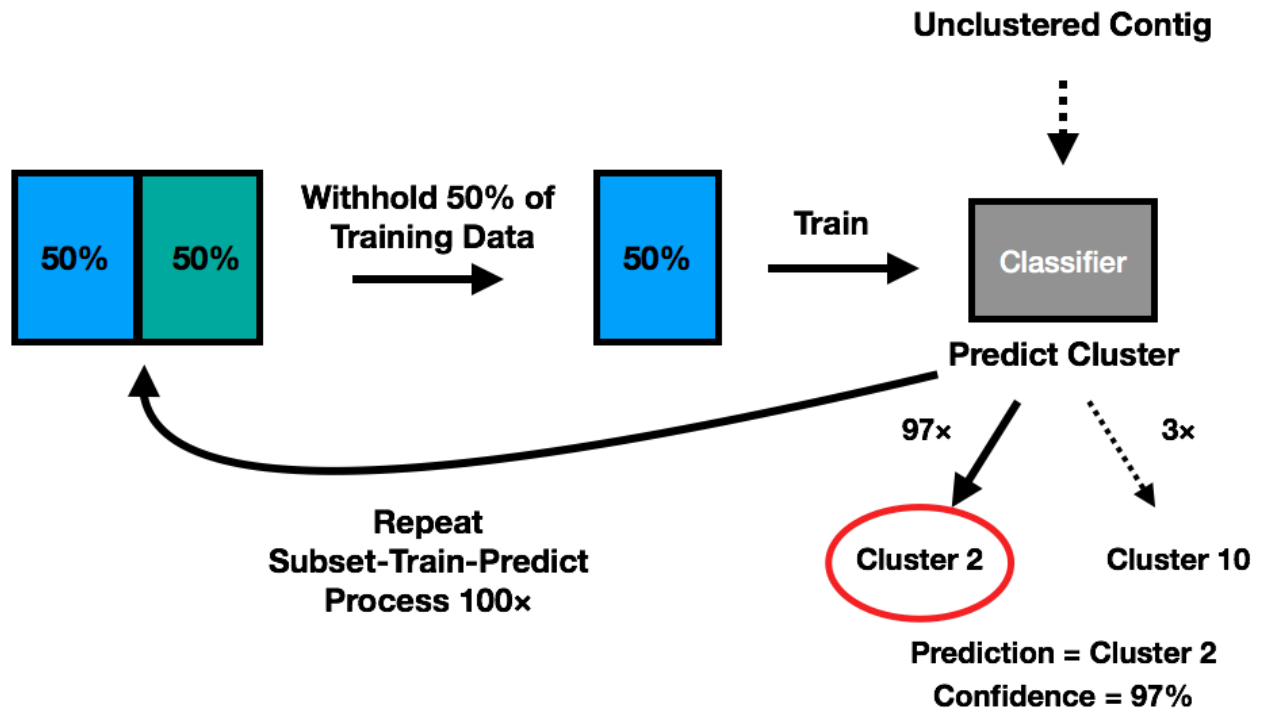

**Figure S1.** Schematic of jackknife cross validation concept, adapted from (Chevrette *et al.*, 2017).

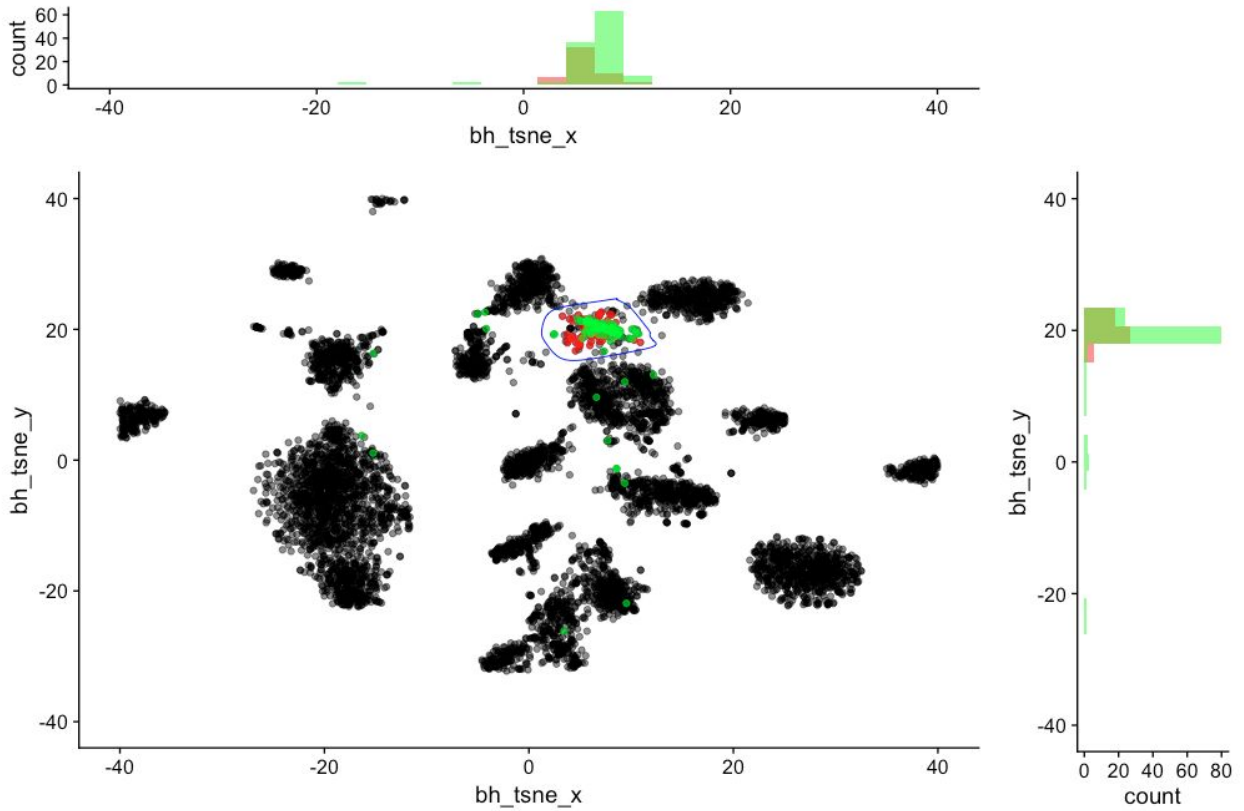

**Figure S2.** Nucleotide composition profiles of potential “*Ca. E. sertula*” contigs as identified by Autometa and MyCC. Contigs that were newly identified by both Autometa and MyCC as belonging to their “*Ca. E. sertula*” bin are colored in red whereas those that were previously classified as “*Ca. E. sertula*” by our previous semi-manual approach (Miller, Vanee, *et al.*, 2016; Miller, Weyna, *et al.*, 2016) are colored in green.



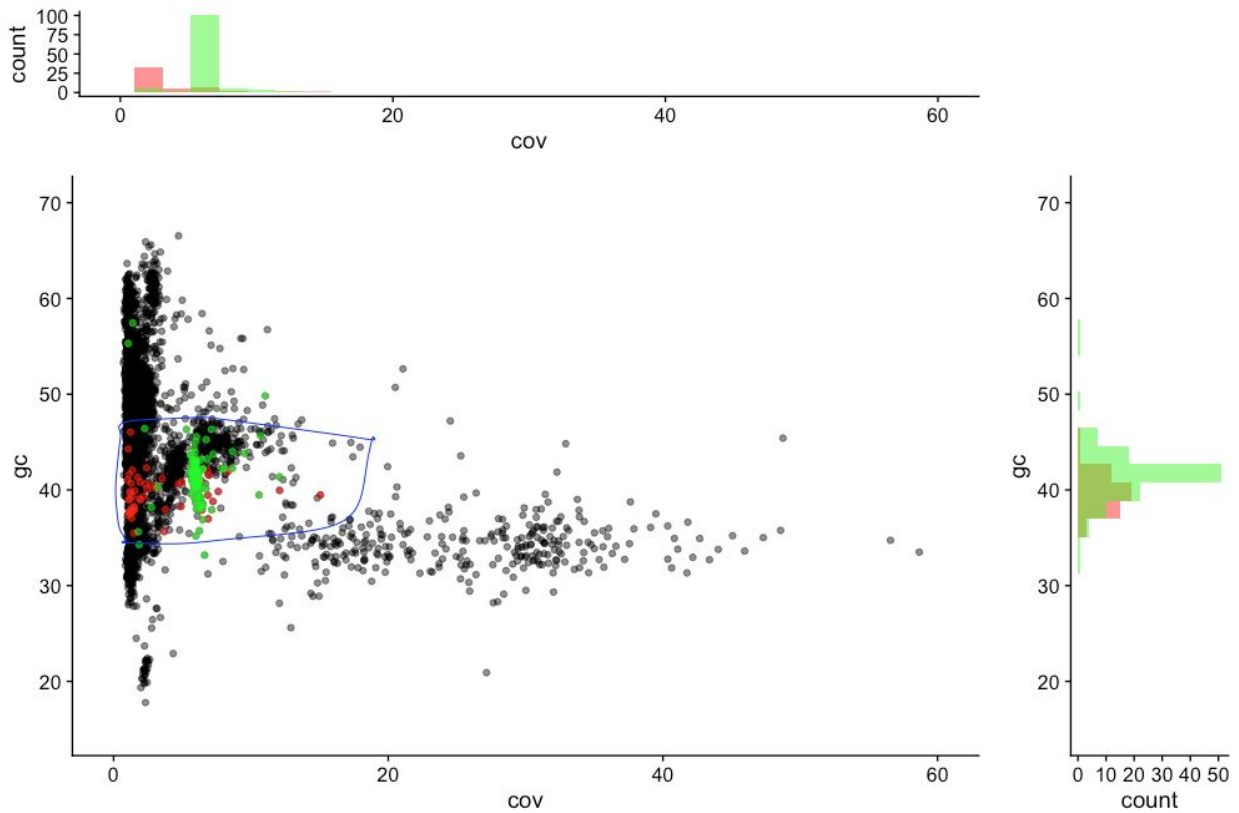

**Figure S3.** GC% and sequence coverage profiles of potential “*Ca. E. sertula*” contigs as identified by Autometa and MyCC. Contigs that were newly identified by both Autometa and MyCC as belonging to their “*Ca. E. sertula*” bin are colored in red whereas those that were previously classified as “*Ca. E. sertula*” by our previous semi-manual approach (Miller, Vanee, *et al.*, 2016; Miller, Weyna, *et al.*, 2016) are colored in green.

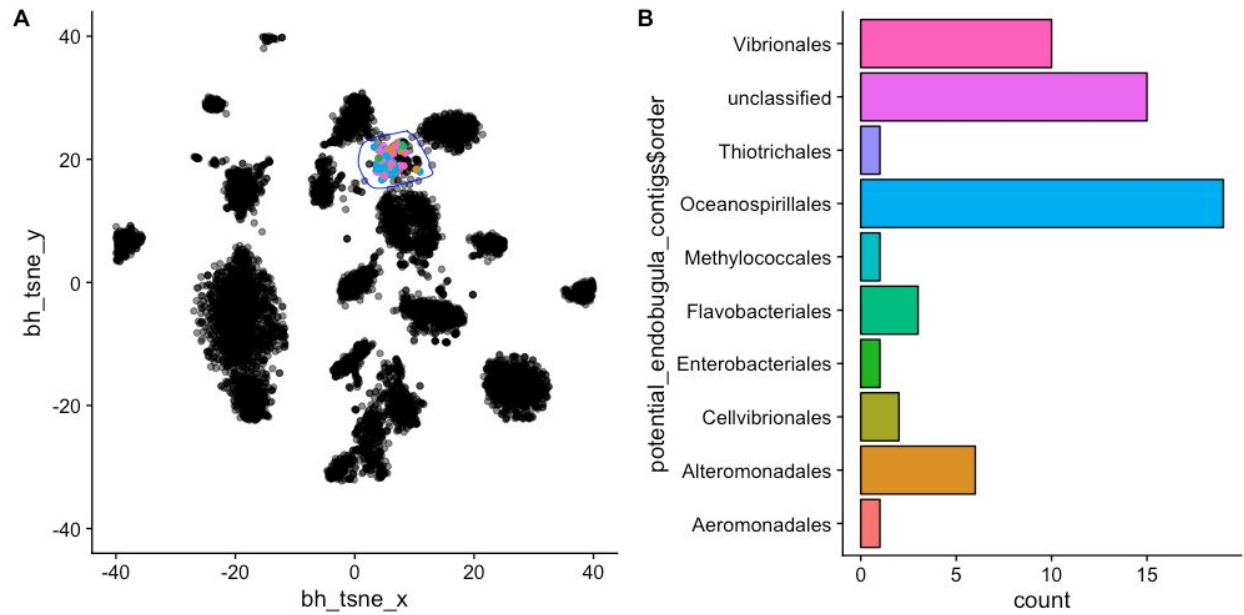

**Figure S4.** Taxonomic classification of potential “Ca. E. sertula” contigs as defined by Autometa’s LCA workflow. Nineteen of 51 contigs are classified as “Oceanospirillales” as the order level. Sixteen of these 19 contigs are classified as “Endozoicomonas” at the genus level and thus likely represent contamination with the “AB1\_endozoicomonas genome” bin we identified in a previous study by semi-manual binning approach (Miller, Weyna, *et al.*, 2016).

## Supplementary References

- Chevrette, M.G. *et al.* (2017) SANDPUMA: Ensemble Predictions of Nonribosomal Peptide Chemistry Reveals Biosynthetic Diversity across Actinobacteria. *Bioinformatics*.
- Mikheenko, A. *et al.* (2016) MetaQUAST: evaluation of metagenome assemblies. *Bioinformatics*, **32**, 1088–1090.
- Miller, I.J., Vanee, N., *et al.* (2016) Lack of overt genome reduction in the bryostatin-producing bryozoan symbiont 'Candidatus Endobugula sertula'. *Appl. Environ. Microbiol.*, **82**, 6573–6583.
- Miller, I.J., Weyna, T.R., *et al.* (2016) Single sample resolution of rare microbial dark matter in a marine invertebrate metagenome. *Sci. Rep.*, **6**, 34362.
- Nurk, S. *et al.* (2017) metaSPAdes: a new versatile metagenomic assembler. *Genome Res.*
